# Supplementary material for: Evaluation of splenic accumulation and colocalization of immature reticulocytes and Plasmodium vivax in asymptomatic malaria: A prospective human splenectomy study
Source: PubMed Central journal article supplement (PMC8154101; doi:10.1371/journal.pmed.1003632), 2021-05-26

Patient 1  
446 g

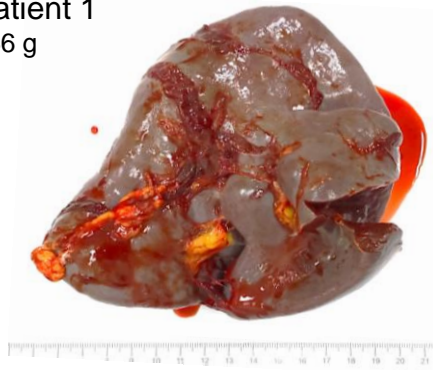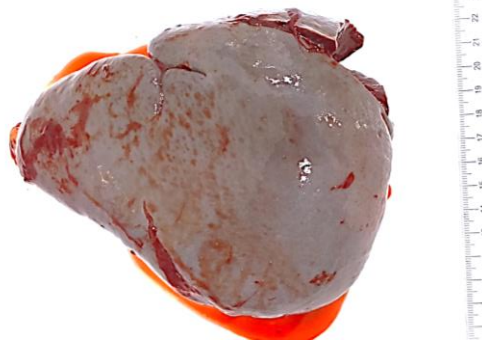

Patient 2  
300 g

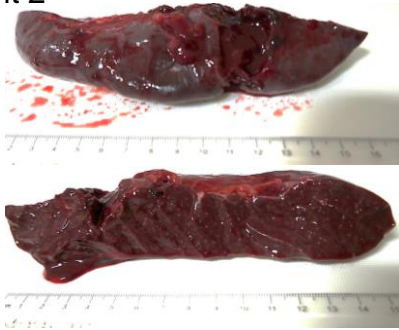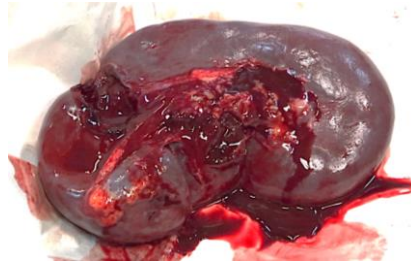

Patient 3  
690 g

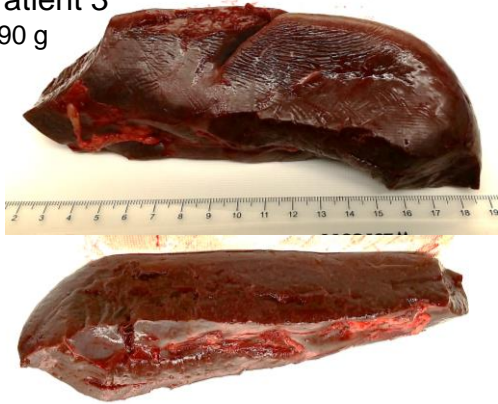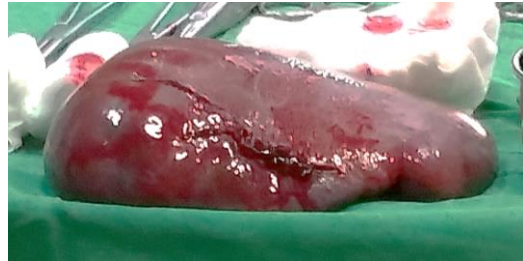

Patient 4  
279 g

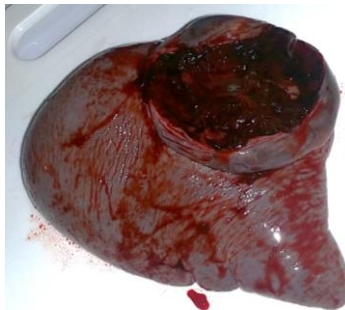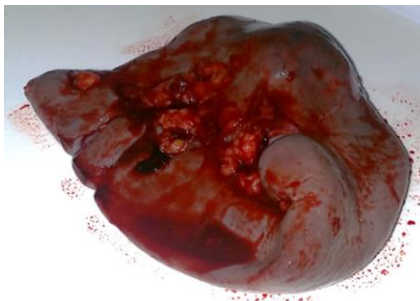

Patient 5

335 g

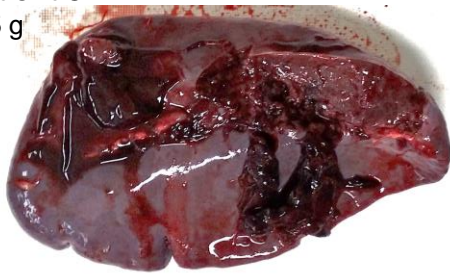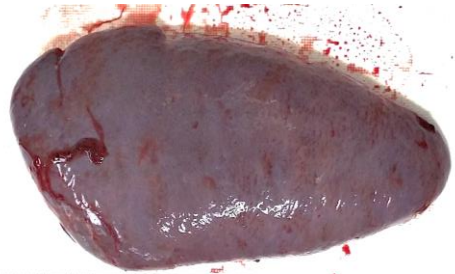

Patient 6

211 g

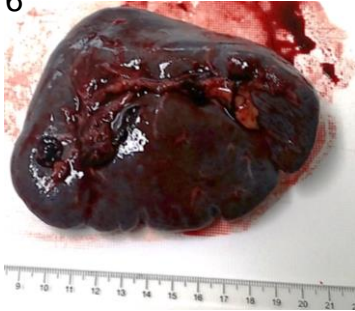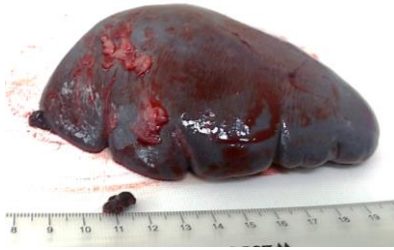

Patient 7

658 g

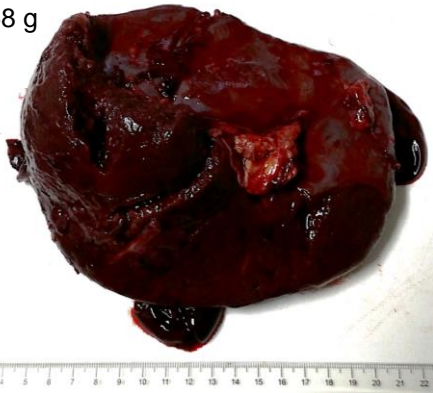

Patient 8

761 g

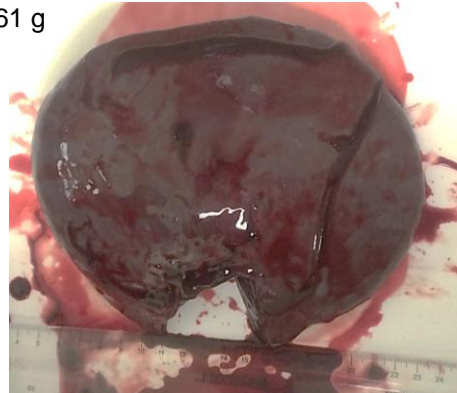

Patient 9

785 g

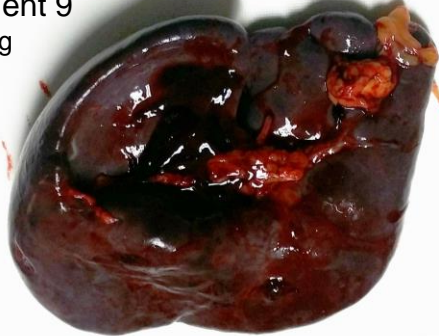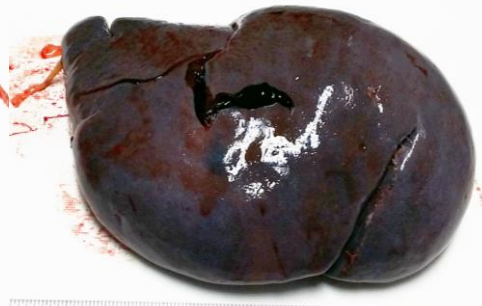

Patient 10  
438 g

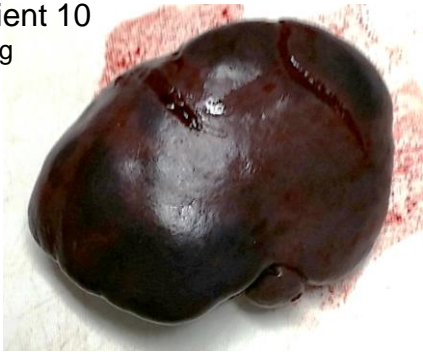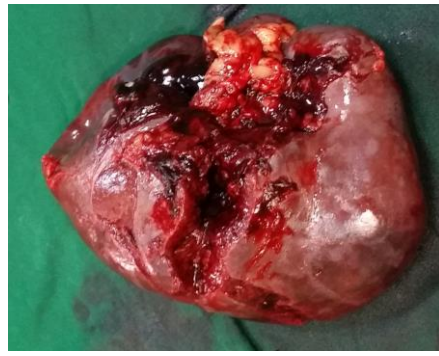

Patient 11  
142 g

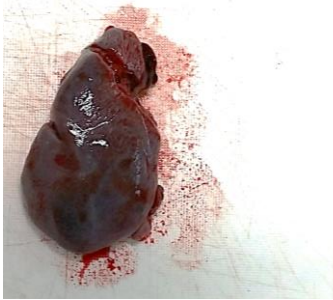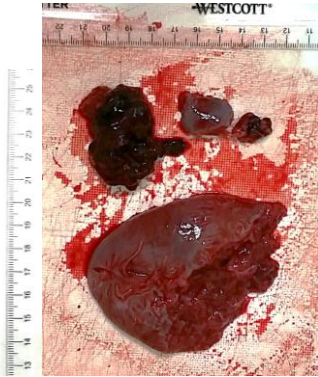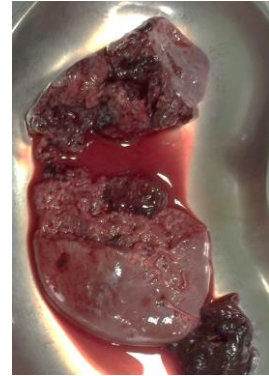

Patient 12  
490 g

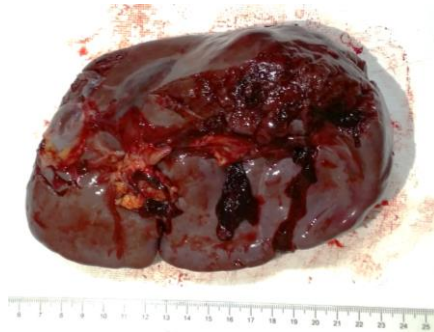

Patient 14  
704 g

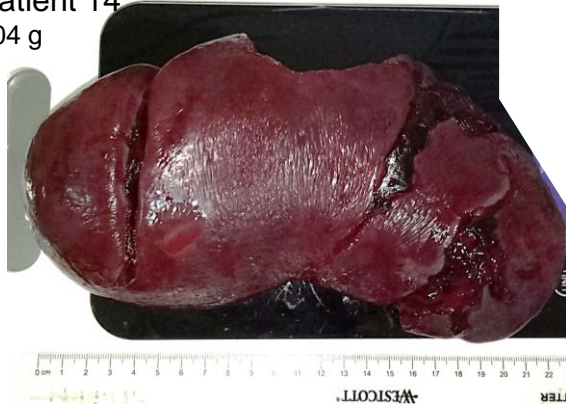

Patient 15  
263 g

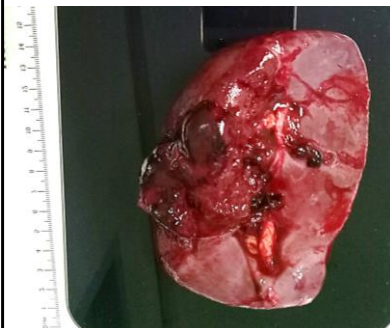

Patient 16  
1250 g

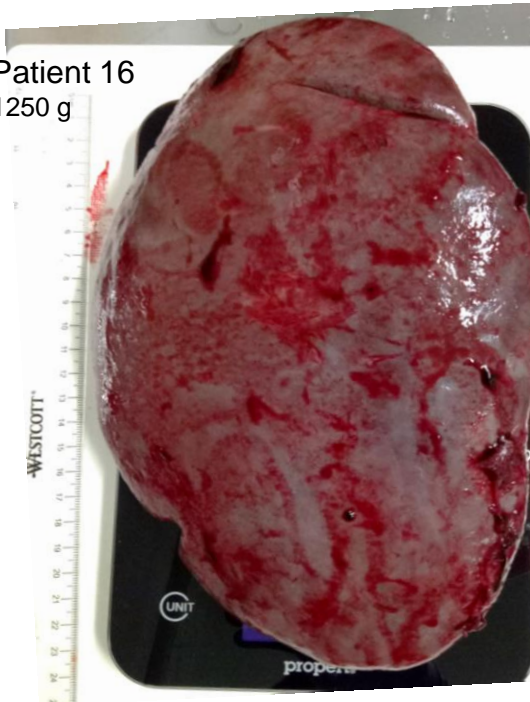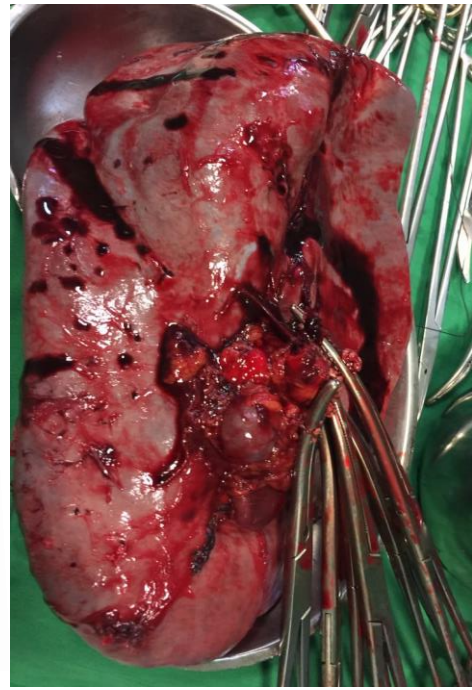

Patient 17  
358 g

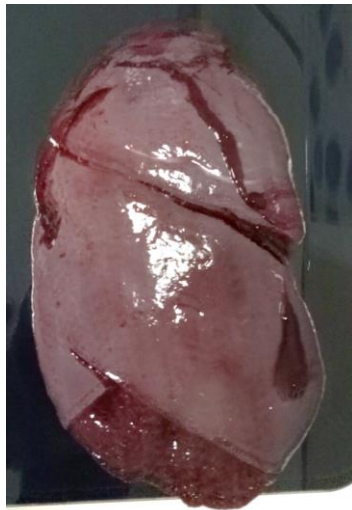

Patient 18  
130 g

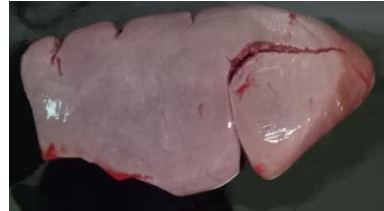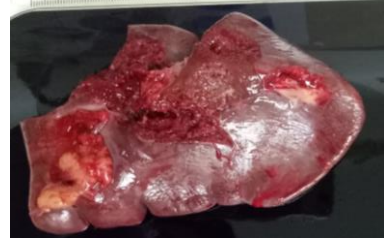

Patient 19  
228 g

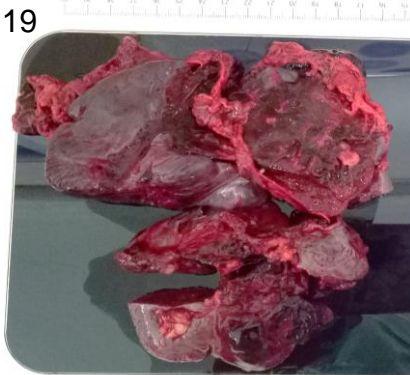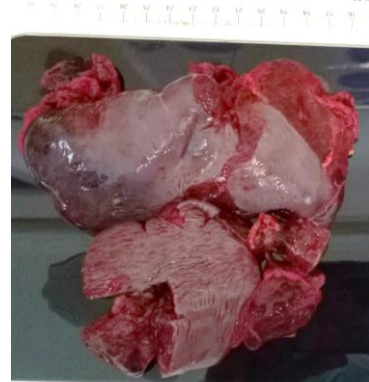

Patient 20  
1918 g

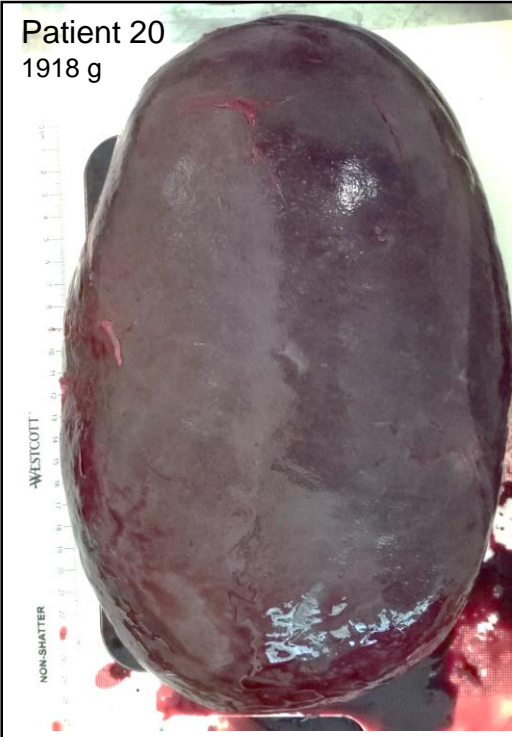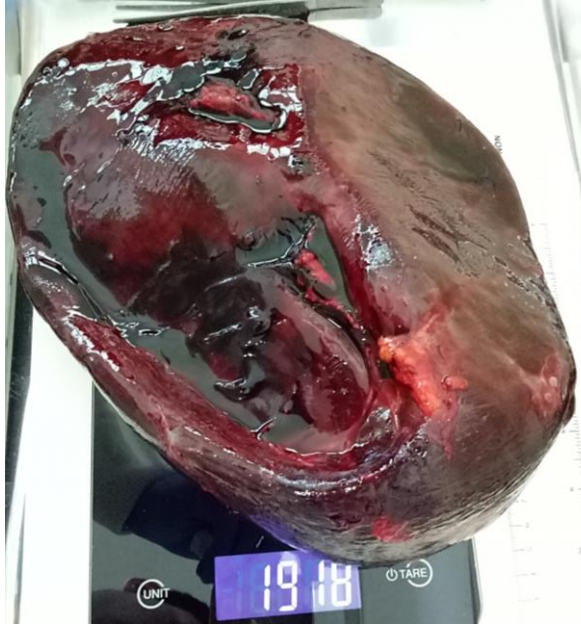

Patient 21  
454 g

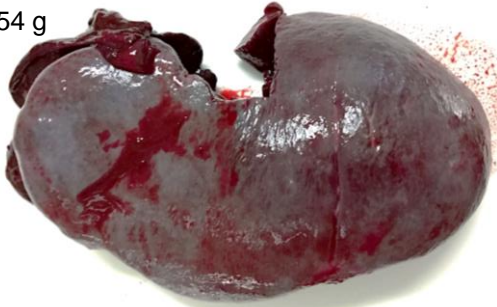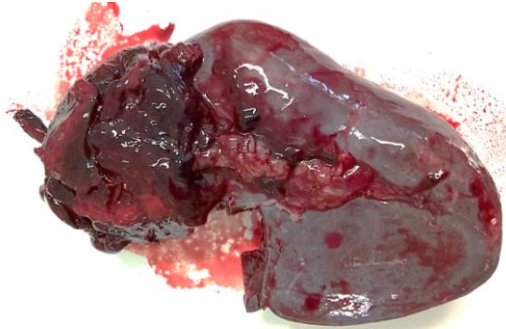

Patient 22  
80 g

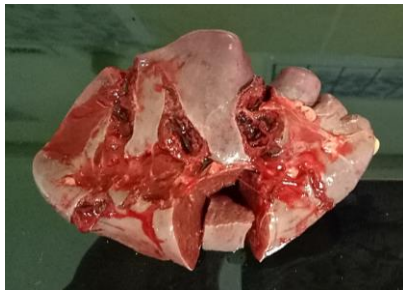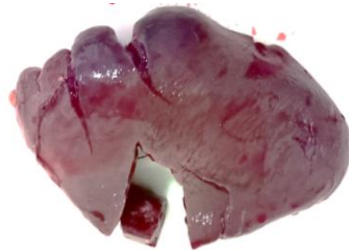

Supplement: pmed.1003632.s003.pdf [file pmed.1003632.s003.pdf]
